# Supplementary material for: Identification of the Weevil immune genes and their expression in the bacteriome tissue
Source: Springer Nature journal article supplement (doi:10.1186/1741-7007-6-43), 2008-10-16
Supplement: Additional file 1 [file 1741-7007-6-43-S1.pdf]

**Additional File 1: Characteristics of the ESTs from the subtracted library with homology to immune genes.**

| GenBank Acc. Num <sup>a</sup> . | EST <sup>b</sup> | Unigene <sup>c</sup> | CN                  | Protein description                   | E-value (Hit) | UniProt Acc. Num. |
|---------------------------------|------------------|----------------------|---------------------|---------------------------------------|---------------|-------------------|
| <b>Antibacterial peptides</b>   |                  |                      |                     |                                       |               |                   |
| EY122872                        | INF-18           | INF-CL60Contig1      | 2                   | Coleopterucin                         | 3E-15         | P80032            |
| EY123087                        | INF-42           | INF-CL6Contig2       | 6 (+6) <sup>d</sup> | Diptericin A                          | 2.6           | Q8WTD5            |
| EY122826                        | INF-145          | INF-CL9Contig1       | 6                   | Acaloleptin A                         | 2E-15         | Q76K70            |
| EY122846                        | INF-163          | INF-CL13Contig1      | 4                   | Cecropin A1                           | 0.68          | P81685            |
| EY122848                        | INF-165          | INF-CL5Contig1       | 15                  | Sarcotoxin II-1                       | 0.67          | P24491            |
| EY122898                        | INF-217          | INF-CL16Contig1      | 4 (+6) <sup>d</sup> | Tenecin-1                             | 3E-13         | Q27023            |
| EY123143                        | INF-479          | INF-CL15Contig1      | 2 (+2) <sup>d</sup> | Luxuriosin                            | 0.18          | Q60FC9            |
| <b>Lysozymes</b>                |                  |                      |                     |                                       |               |                   |
| EY122836                        | INF-152          | INF-152-frag1        | 1                   | Lysozyme i-1                          | 1E-05         | Q6GU90            |
| EY122958                        | INF-282          | INF-282-frag1        | 1                   | Lysozyme C-1                          | 6E-17         | P00705            |
| <b>PGRP</b>                     |                  |                      |                     |                                       |               |                   |
| EY123248                        | INF-9            | INF-9-frag1          | 1                   | PGRP sb2                              | 7E-57         | Q1HRH3            |
| EY123099                        | INF-441          | INF-441-frag1        | 1                   | PGRP                                  | 9E-38         | A0T2Q1            |
| <b>Immune regulator</b>         |                  |                      |                     |                                       |               |                   |
| EY123020                        | INF-359          | INF-359-frag2        | 1                   | TOLLIP                                | 3E-48         | Q9QZ06            |
| <b>Proteases</b>                |                  |                      |                     |                                       |               |                   |
| EY122892                        | INF-20           | INF-20-frag1         | 1                   | IMPI                                  | 2E-11         | P82176            |
| EY123240                        | INF-91           | INF-CL19Contig1      | 3                   | Cysteine-rich venom-like protein      | 7E-09         | Q5MIW2            |
| EY122936                        | INF-258          | INF-258-frag1        | 1                   | Pattern recognition serine proteinase | 7E-28         | Q69BL0            |
| EY123118                        | INF-459          | INF-459-frag2        | 1                   | Hemolymph proteinase 17               | 3E-10         | Q5MPB8            |
| EY123189                        | INF-515          | INF-515-frag1        | 1 (+7) <sup>d</sup> | Trypsin-like serine proteinase        | 5E-27         | Q64ID5            |
| <b>Phenoloxidase pathway</b>    |                  |                      |                     |                                       |               |                   |
| EY123180                        | INF-506          | INF-506-frag1        | 1                   | PPAF                                  | 2E-15         | Q9GRW0            |
| EY123227                        | INF-74           | INF-CL23Contig1      | 3                   | Serpin-4A                             | 2E-20         | Q6Q2D8            |
| <b>Cytoskeleton</b>             |                  |                      |                     |                                       |               |                   |
| EY122818                        | INF-13           | INF-13-frag1         | 1                   | profilin                              | 3E-29         | Q6QEJ7            |
| -                               | -                | -                    | -                   | actin                                 | -             | -                 |

<sup>a</sup>. The accession number and <sup>b</sup>. the name of the EST sequence used for RACE and qRT-PCR

primer design. <sup>c</sup>. The name of the corresponding Unigene in the database <http://mandragore.univ-lyon1.fr/sitozea> (login: sitophilus, password: zeamais). <sup>d</sup>. The number of clones corresponding to

additional isoforms of the EST is given in brackets. Acc. Num., accession number; CN, copy

number: number of clones found in the subtracted library.
