# Supplementary material for: Identification of the Weevil immune genes and their expression in the bacteriome tissue
Source: Springer Nature journal article supplement (doi:10.1186/1741-7007-6-43), 2008-10-16
Supplement: Additional file 2 [file 1741-7007-6-43-S2.pdf]

**Additional File 2 : Primers used for 3'- and 5'-RACE (GSP1 and GSP2, respectively) and qRT-PCR.**

<sup>a</sup>. primer used in a 5'-RACE nested PCR

<sup>b</sup>. primer annealing temperature

| <b>RACE Primers</b>        | <b>Sequence (5'- 3')</b> |
|----------------------------|--------------------------|
| Inf-9-GSP1                 | TGTTTCTCGGACTTGCCTATGACC |
| Inf-9-GSP2                 | CTCTACCAGTCCCTTACGTCGTC  |
| Inf-18-GSP1                | GCCATTGATGTTCTTGCCCCAGC  |
| Inf-18-GSP2                | TGGGAGGTAAGACCAGACCTGTC  |
| Inf-42-GSP1                | CCAACACGTTTGTACCCGGTGTG  |
| Inf-152-GSP2               | GGACGCCAGTCAGGTGACTCTAC  |
| Inf-165-GSP1               | CGTGGTCAGCACCAACGCCAAA   |
| Inf-165-GSP2               | CATCACCTCGACGGTTCTGGCTA  |
| Inf-217-GSP1               | AATGGGCCGCACAAGCTGAATCG  |
| Inf-282-GSP1               | GAGAATTCCGTAGTCGCCGGTCT  |
| Inf-359-GSP2               | CACCTACGGACCCTAATGGTGGC  |
| Inf-441-GSP1               | CCCAACCCTTCTGGTCCATGTGG  |
| Inf-441-GSP2               | CCTTCTGCTGCACAGTTGACGGC  |
| Inf-441-GSPN2 <sup>a</sup> | CAGCAACTGCCTGCCCTGGTGAC  |
| Inf-479-GSP2               | GGGTCTCACGGCGAATACAGAGAC |

| <b>qRT-PCR Primers</b> | <b>Sequence (5'- 3')</b> | <b>T°C<sup>b</sup></b> | <b>qRT-PCR Primers</b> | <b>Sequence (5'- 3')</b> | <b>T°C<sup>b</sup></b> |
|------------------------|--------------------------|------------------------|------------------------|--------------------------|------------------------|
| 5'inf-9                | ATAATTTGCTGTTGGAGGG      | 58                     | 5'inf-165              | AGTCACAAAGGAACAATTTTGG   | 58                     |
| 3'inf-9                | TCTCGGACTTGCCTATGACC     |                        | 3'inf-165              | AGAAGCCGTACAGTCCGTTT     |                        |
| 5'inf-13               | GAAGAGGTGAGGATGTCCT      | 58                     | 5'inf-217              | ACGCTGTAGTGATAAGTGCA     | 58                     |
| 3'inf-13               | ACATGAGTTGGCAGGATTAC     |                        | 3'inf-217              | CACACGTACAGGTCCTTCT      |                        |
| 5'inf-18               | GAATAGATAACAACGGGGGTCA   | 58                     | 5'inf-282              | GCGGGGAAAAAAGTGGCGTA     | 58                     |
| 3'inf-18               | CTACCATCTGACACTTCCTC     |                        | 3'inf-282              | CCATCGGGATTGTGGTTTTTAG   |                        |
| 5'inf-20               | ACCCTGGACCTAACGATCC      | 58                     | 5'inf-359              | AAGAGCGACGCAATAGGGT      | 58                     |
| 3'inf-20               | TACTGCTACAAACGAACATTG    |                        | 3'inf-359              | CATTAGGGTCCGTAGGTGT      |                        |
| 5'inf-42               | TCAGGATGAAGATGGCCAAG     | 58                     | 5'inf-441              | TGCAAGGCCTGCCCTTAGT      | 58                     |
| 3'inf-42               | ACACTGGTACTCTGGCATCT     |                        | 3'inf-441              | GTGCCATCTCCTCCAATCAT     |                        |
| 5'inf-74               | TCTGTTGTATGGCATTCCGA     | 58                     | 5'inf-459              | CAACAAATCCAGACGAGCC      | 58                     |
| 3'inf-74               | AGCGCTTGAAGTATCGAACT     |                        | 3'inf-459              | ACCACCGCATAGCCATCG       |                        |
| 5'inf-91               | GATCGGTATACTTCAGCGAA     | 58                     | 5'inf-479              | ACCTTACGACCCACACAT       | 58                     |
| 3'inf-91               | AACGCATCTACCAGTTCTGT     |                        | 3'inf-479              | GTCATACGATACGTTTTTCACT   |                        |
| 5'inf-145              | TCGGCATCCCCTAATCCAGAC    | 64                     | 5'inf-506              | CAATCGTTTATGGTCAGGAC     | 58                     |
| 3'inf-145              | CTACCAGCGGATGGCGCCACC    |                        | 3'inf-506              | GGAATTCCACAACAAACGTC     |                        |
| 5'inf-152              | CTCTCCGTCACCTCGTGTTAT    | 58                     | 5'inf-515              | GGTTCGAACGCCGTCAGA       | 58                     |
| 3'inf-152              | TCCTGCTCGTTCTTTGTCAT     |                        | 3'inf-515              | TCACGGAGATGTCGTTAGC      |                        |
| 5'inf-163              | GTCCTGTTAGTTGTGGCAGTA    | 58                     | Actin-for              | CAACTTCCCTAGAAAAGAGC     | 60                     |
| 3'inf-163              | TTATCTTCCAGGCACCAATCC    |                        | Actin-rev              | TTCCTTCTGCATCCTGTCCG     |                        |
|                        |                          |                        | Gapdh-for              | AACTTTGCCGACAGCCTTGG     | 58                     |
|                        |                          |                        | Gapdh-rev              | GCGCCCATGTATGTAGTTGG     |                        |
